# Supplementary material for: Interpreting past trophic ecology of a threatened alpine parrot, kea Nestor notabilis, from museum specimens
Source: PubMed Central journal article supplement — J Anim Ecol. 2022 May 23;92(2):273–84. doi: 10.1111/1365-2656.13742 (PMC10083992; doi:10.1111/1365-2656.13742), 2022-05-23
Supplement: JANE-92-273-s001.pdf [file JANE-92-273-s001.pdf]

Supplementary Materials for  
**Interpreting past trophic ecology of a threatened species, kea (*Nestor notabilis*), from museum specimens**

Priscilla M Wehi\*, Karyne M Rogers, Tim Jowett, Amandine J M Sabadel

\*Corresponding author. Email: priscilla.wehi@otago.ac.nz

**This pdf file includes:**

Figures S1 to S4.

Tables S1 to S5.

**Other supplementary materials for this manuscript include the following:**

Data S1.

**Fig. S1.** Feather bulk  $\delta^{13}\text{C}$  values through time, for kea captured from 1877 through to 2007, showing the increase in  $\delta^{13}\text{C}$  variance after 1950.

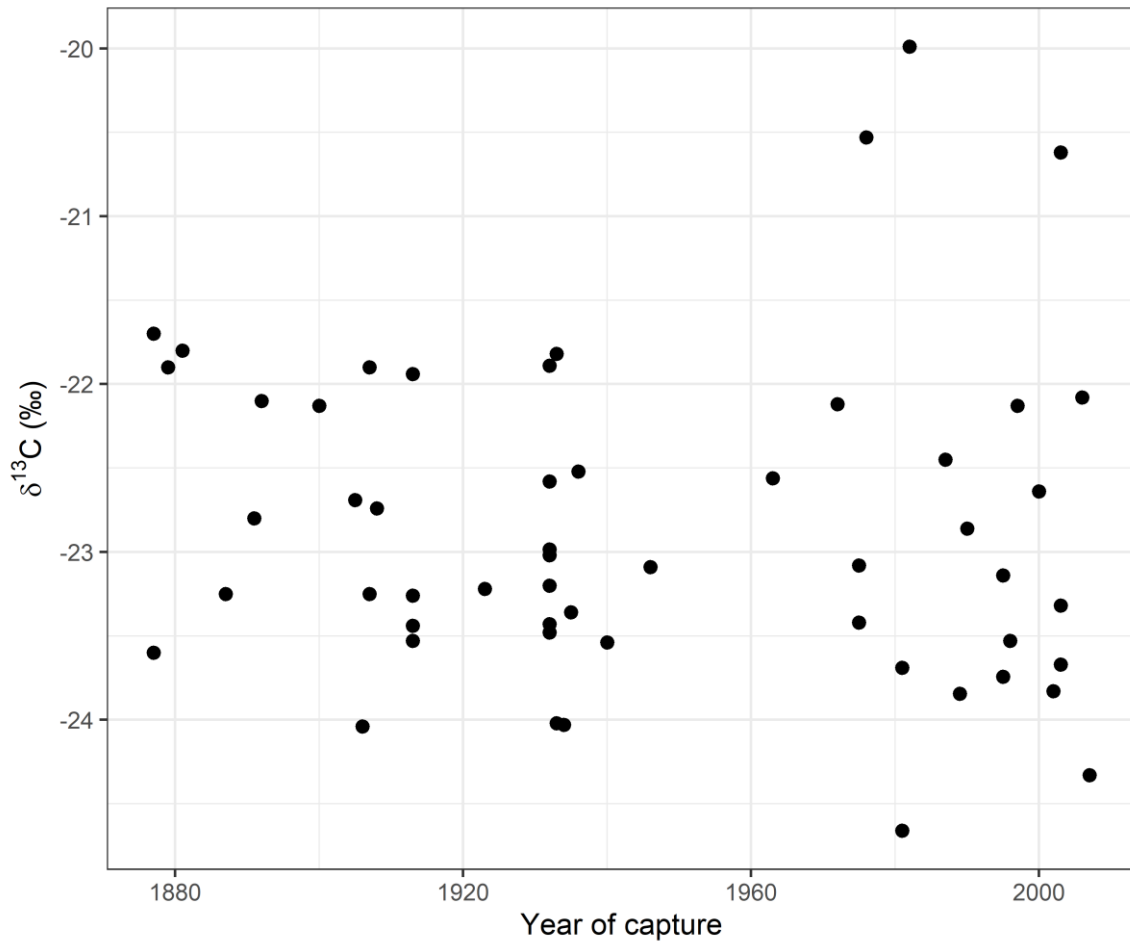

**Fig. S2.** Biplot of bulk  $\delta^{15}\text{N}$  vs  $\delta^{13}\text{C}$  values with 95% confidence interval ellipses for kea classified as north (black circles, male and female) or south (red circles, male and female). North corresponds to the Canterbury region, and south approximates the Otago region of New Zealand.

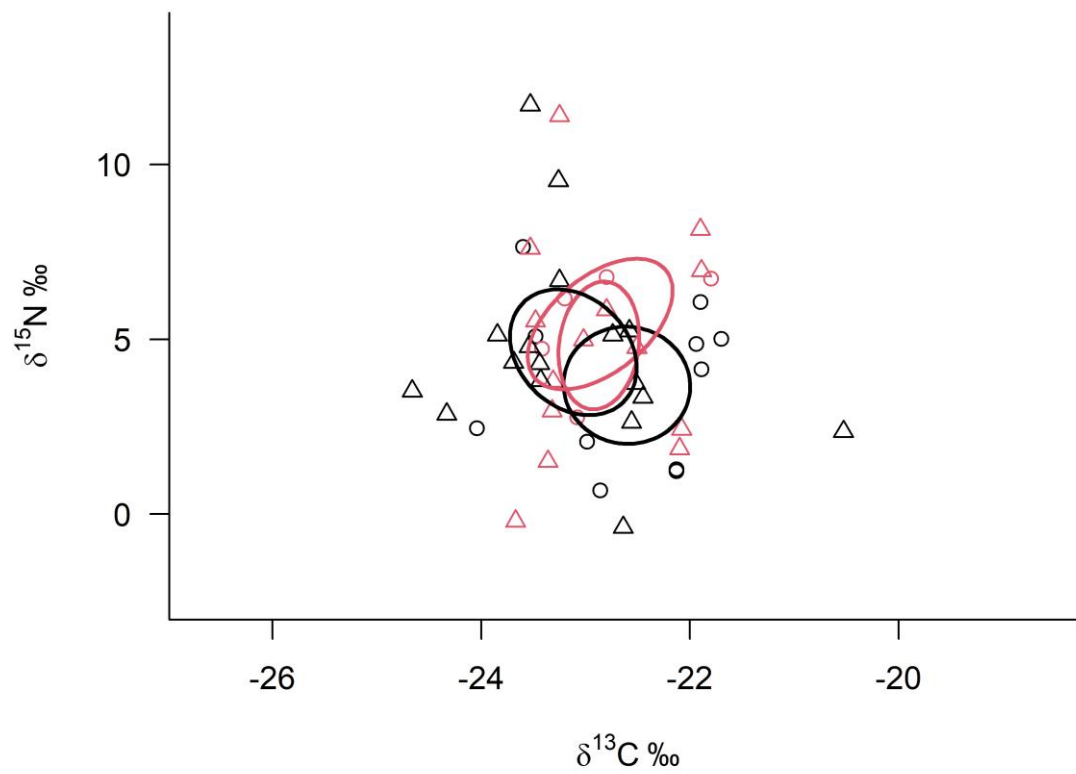

**Fig. S3.** Relationship of  $\delta^{15}\text{N}$  Phe with bulk  $\delta^{15}\text{N}$  values for feathers from 18 individual kea from museum collections. 95% confidence intervals are shown.

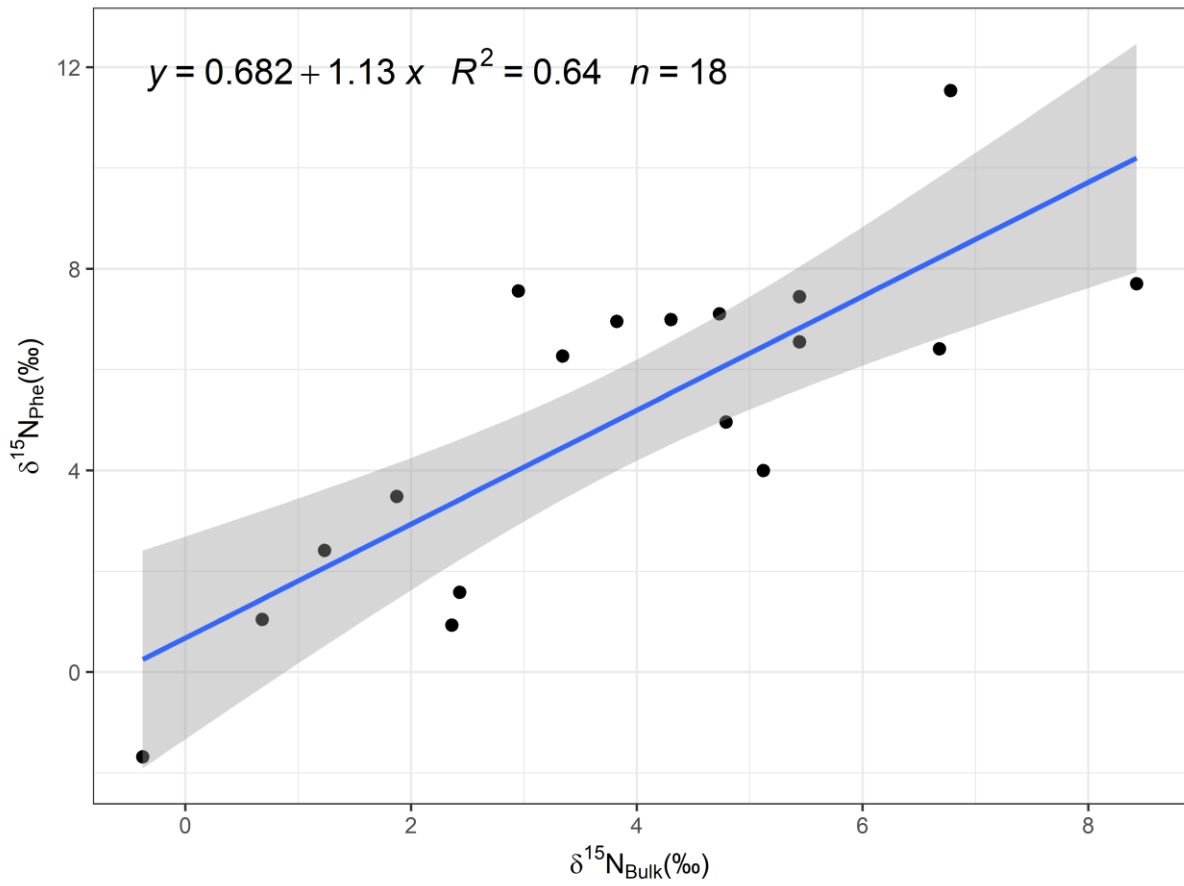

**Fig. S4.** Trophic position as estimated by the relationship of AA compounds Glx-Phe does not increase significantly through time.

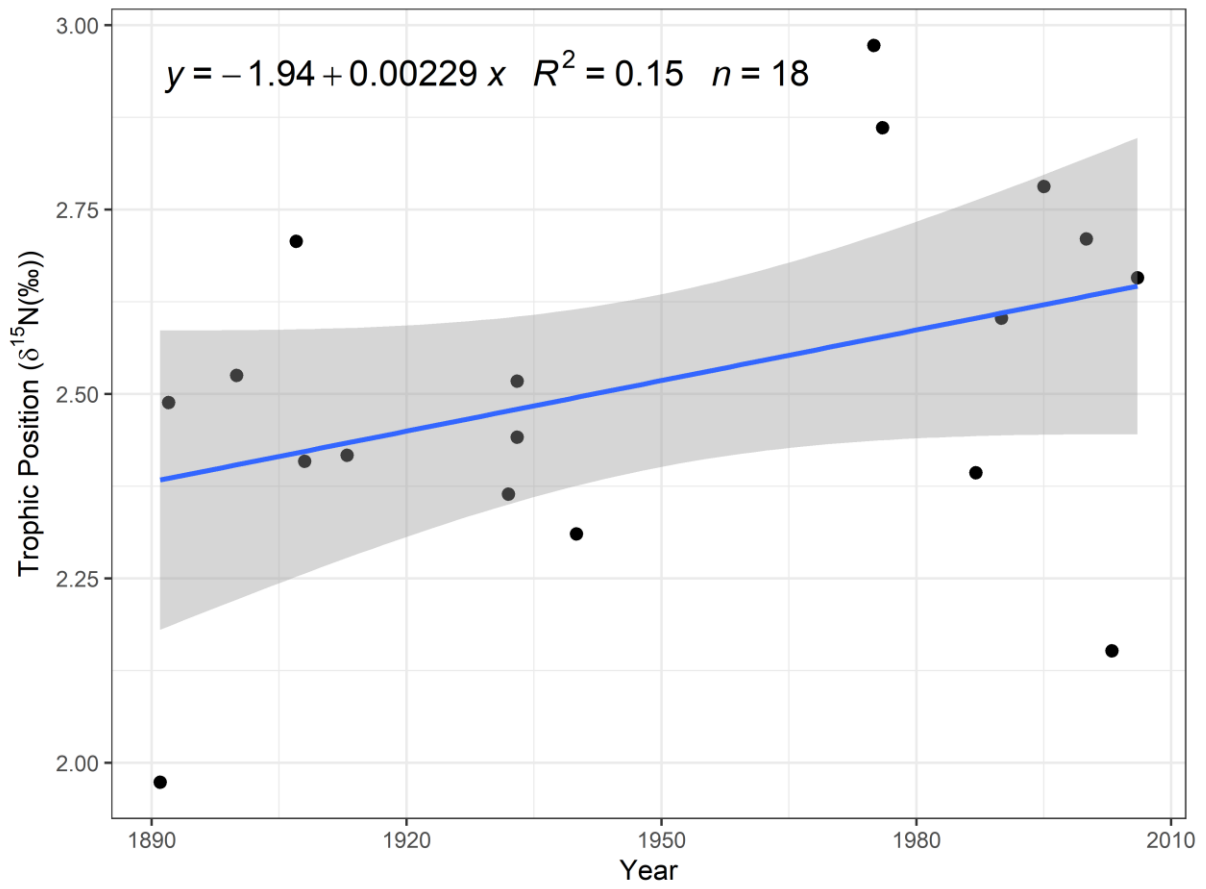

**Table S1.** Summary statistics for the linear mixed effects model for  $\delta^{15}\text{N}$  values.

*Formula:*  $\delta^{15}\text{N} \sim \text{YearS} + \text{CulmenS} + \text{EstSex} + \text{Region} + (1 \mid \text{TidyLocation})$

Linear mixed model fit by REML. t-tests use Satterthwaite's method. REML criterion at convergence: 171.3

*Scaled residuals:*

| Min      | 1Q       | Median  | 3Q      | Max     |
|----------|----------|---------|---------|---------|
| -1.30667 | -0.53481 | 0.02063 | 0.37240 | 1.75116 |

*Random effects:*

| Groups       | Name        | Variance | Std.Dev. |
|--------------|-------------|----------|----------|
| TidyLocation | (Intercept) | 5.551    | 2.356    |
| Residual     |             | 1.566    | 1.251    |

Number of obs: 41, groups: TidyLocation, 25

*Fixed effects:*

|             | Estimate | Std. Error | df     | t value | Pr(> t )     |
|-------------|----------|------------|--------|---------|--------------|
| (Intercept) | 3.618    | 0.809      | 31.729 | 4.471   | 9.31e-05 *** |
| YearS       | -1.361   | 0.382      | 35.628 | -3.560  | 0.001 **     |
| CulmenS     | 0.036    | 0.418      | 28.457 | 0.087   | 0.931        |
| EstSexm     | 0.886    | 0.790      | 22.563 | 1.122   | 0.274        |
| RegionSouth | 0.156    | 1.070      | 20.317 | 0.146   | 0.886        |

Signif. codes: 0 '\*\*\*', 0.001 '\*\*', 0.01 '\*', 0.05 '.', 0.1 ' ' 1

**Table S2.** Summary statistics for the linear mixed effects model with the primary focus on region and habitat effects - bulk  $\delta^{15}\text{N}$  values and habitat type (“human” and “wild”).

*Formula:*  $\delta^{15}\text{N} \sim \text{Region} + \text{Habitat} + \text{EstSex} + \text{Age2} + \text{CulmenS} + (1 \mid \text{Location})$

Linear mixed model fit by REML. t-tests use Satterthwaite's method. REML criterion at convergence: 182.5

*Scaled residuals:*

|         |         |        |        |        |
|---------|---------|--------|--------|--------|
| Min     | 1Q      | Median | 3Q     | Max    |
| -1.5457 | -0.5364 | 0.1426 | 0.5020 | 1.4220 |

*Random effects:*

|                      |      |          |          |
|----------------------|------|----------|----------|
| Groups               | Name | Variance | Std.Dev. |
| Location (Intercept) |      | 4.926    | 2.220    |
| Residual             |      | 1.901    | 1.379    |

Number of obs: 44, groups: Location, 27

*Fixed effects:*

|             | Estimate | Std. Error | df       | t value | Pr(> t ) |
|-------------|----------|------------|----------|---------|----------|
| (Intercept) | 1.97336  | 1.04242    | 33.83639 | 1.893   | 0.067    |
| RegionSouth | 0.40817  | 1.01470    | 23.19608 | 0.402   | 0.691    |
| HabitatWild | 3.18239  | 0.96628    | 34.35583 | 3.293   | 0.002 ** |
| EstSexm     | 0.63968  | 0.84645    | 25.54518 | 0.756   | 0.457    |
| Age2young   | 0.07070  | 0.77760    | 19.49723 | 0.091   | 0.929    |
| CulmenS     | 0.01554  | 0.45801    | 31.43551 | 0.034   | 0.973    |

Signif. codes: 0 ‘\*\*\*’ 0.001 ‘\*\*’ 0.01 ‘\*’ 0.05 ‘.’ 0.1 ‘ ’ 1

*Expected marginal means for each level of the Region and Habitat model.* Results are averaged over the levels of: Region, EstSex, Age2. Degrees-of-freedom method: Kenward-Roger, confidence level used is 0.95.

| Habitat | emmean | SE    | df   | lower.CL | upper.CL |
|---------|--------|-------|------|----------|----------|
| human   | 2.53   | 0.787 | 29.1 | 0.924    | 4.14     |
| wild    | 5.72   | 0.674 | 33.0 | 4.344    | 7.09     |

*Contrast (difference of means) table between the two habitats.* Results are averaged over the levels of: Region, EstSex, Age2. Degrees-of-freedom method is Kenward-Roger.

| contrast     | estimate | SE | df     | t.ratio | p.value |
|--------------|----------|----|--------|---------|---------|
| human - wild | -3.18    |    | 1 34.8 | -3.171  | 0.0032  |

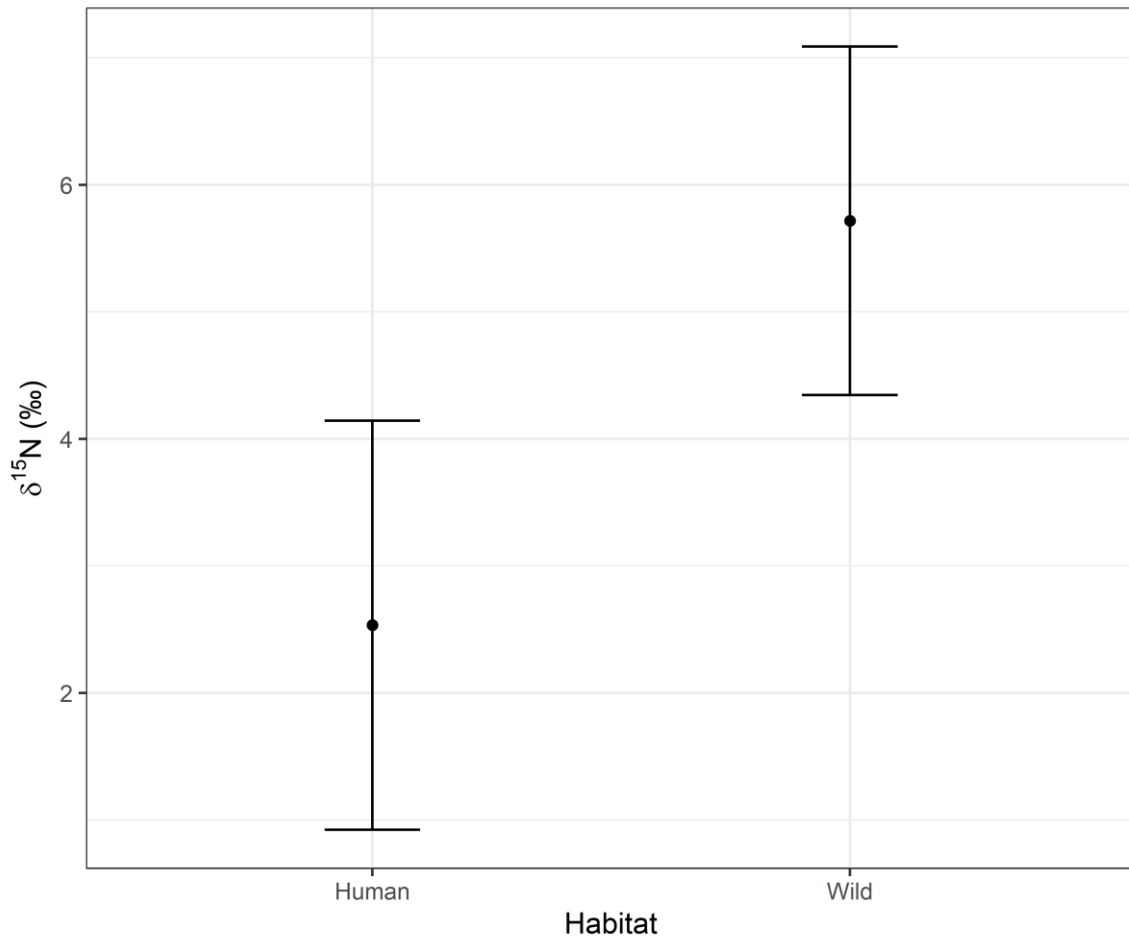

**Table S3.** Atomic C:N ratios and culmen length. Descriptive statistics and F-test results.

# A tibble: 2 x 4

| <b>Culmen Class</b> | <b>n</b> | <b>Variance</b> | <b>SD</b> |
|---------------------|----------|-----------------|-----------|
| 1                   | Q1       | 16 0.117        | 0.342     |
| 2                   | Q4       | 15 0.00444      | 0.0666    |

*F test to compare two variances*

F = 26.377, num df = 15, denom df = 14, p-value = 2.189e-07

Alternative hypothesis: true ratio of variances is not equal to 1

95% confidence interval (8.94, 76.27)

sample estimates: ratio of variances 26.37738



**Table S4.** Descriptive statistics and F-test results comparing  $\delta^{15}\text{N}$  variance before and after 1950.

The F-test tests for equality of variance, with the F-statistic calculated as the ratio of variance:  $\delta^{15}\text{N}$  (Pre-1950) /  $\delta^{15}\text{N}$  (Post-1950).

| <b>Year</b> | <b>n</b> | <b><math>\delta^{15}\text{N}</math> variance</b> | <b>SD <math>\delta^{15}\text{N}</math></b> |
|-------------|----------|--------------------------------------------------|--------------------------------------------|
| pre-1950    | 35       | 7.610498                                         | 2.758713                                   |
| post-1950   | 22       | 6.307057                                         | 2.511386                                   |

*F test to compare two variances*

F = 1.21, num df = 33, denom df = 21, p-value = 0.66

Alternative hypothesis: true ratio of variances is not equal to 1

95% Confidence Interval (0.53, 2.57)

sample estimates: ratio of variances 1.21

**Table S5.** Stable isotopic values for wild captured birds, by month of death (original data).

| Month     | n  | Var( $\delta^{15}\text{N}$ ) | SD( $\delta^{15}\text{N}$ ) | Var( $\delta^{13}\text{C}$ ) | SD( $\delta^{13}\text{C}$ ) |
|-----------|----|------------------------------|-----------------------------|------------------------------|-----------------------------|
| February  | 4  | 3.42                         | 1.85                        | 0.412                        | 0.642                       |
| May       | 3  | 2.61                         | 1.62                        | 1.54                         | 1.24                        |
| June      | 3  | 7.86                         | 2.8                         | 1.69                         | 1.3                         |
| August    | 8  | 6.11                         | 2.47                        | 0.45                         | 0.67                        |
| September | 10 | 10.3                         | 3.21                        | 0.696                        | 0.835                       |
| October   | 3  | 1.31                         | 1.14                        | 0.81                         | 0.9                         |
| November  | 4  | 9.39                         | 3.06                        | 3.28                         | 1.81                        |
| December  | 3  | 6.97                         | 2.64                        | 2.4                          | 1.55                        |

*Levene's test results for comparing variance across sampling months for  $\delta^{15}\text{N}$ .*

Levene's Test for Homogeneity of Variance (centre = median)

|       | Df | F value | Pr(>F) |
|-------|----|---------|--------|
| group | 8  | 0.4956  | 0.8499 |
|       | 31 |         |        |

*Levene's test results for comparing variance across sampling months for  $\delta^{13}\text{C}$ .*

Levene's Test for Homogeneity of Variance (centre = median)

|       | Df | F value | Pr(>F) |
|-------|----|---------|--------|
| group | 8  | 0.5145  | 0.8362 |
|       | 31 |         |        |
